# Supplementary material
Source: PubMed Central journal article supplement (PMC7966097)
Supplement: 2109_table.pdf [file 2109_table.pdf]

| Characteristics of the patients |              |                                  |                          |                  |                                                 |                                |                                                                  |                                   |
|---------------------------------|--------------|----------------------------------|--------------------------|------------------|-------------------------------------------------|--------------------------------|------------------------------------------------------------------|-----------------------------------|
| No.                             | Sex/Age (yr) | Presentation                     | Main Feeder/ Shunt Level | Drainage         | Coincidental Shunt/ Feeder/Site                 | Aneurysm/ Associated Lesion    | Treatment Target/ Method/Result                                  | Clinical FU Interval (mo)/Outcome |
| 1                               | M/43         | SAH                              | VA Rt/C2                 | Rost             | Spinal pial AVF/ASA VA Lt/C2                    | Pseudoaneurysm/spinal pial AVF | Spinal DAVS and pial AVF/surgery/<br>cured                       | 19/Improved                       |
| 2                               | F/76         | Cbll hem                         | VA Rt/C1                 | Caud             | Cbll AVM/SCA Rt/Cbll                            | Flow-related aneurysm/Cbll AVM | Cbll AVM <sup>a</sup> /NBCA/residual                             | 9/Improved                        |
| 3                               | M/73         | Progressive myelopathy           | CostoCerv Rt/C8          | Rost, Caud       | No                                              | No                             | Spinal DAVS/NBCA/cured                                           | 53/Improved                       |
| 4                               | F/62         | Headache                         | VA Lt/C1                 | Rost, Caud (min) | No                                              | No                             | Spinal DAVS/surgery <sup>b</sup> /cured                          | 2/Improved                        |
| 5                               | M/55         | Neurologic deterioration         | VA Rt/C1                 | Caud             | No                                              | No                             | Spinal DAVS/PVA (150–250) from<br>OA, <sup>c</sup> surgery/cured | 13/Improved                       |
| 6                               | F/51         | Neck pain, swallowing difficulty | VA Rt/C1                 | Rost, Caud       | Brain DAVS/petrosal br ICA<br>Lt/SupPerSin      | No                             | Spinal DAVS/NBCA, PVA, surgery/<br>cured                         | 8/Improved                        |
| 7                               | M/39         | SAH                              | VA Lt/C2, VA Rt/<br>C1   | Rost             | Bilateral spinal DAVS, epidural<br>AVF/VA Rt/C3 | No                             | Bilateral spinal DAVS/surgery/cured                              | 20/Improved                       |
| 8                               | F/55         | Motor, sensory changes           | VA Rt/C1                 | Rost             | No                                              | No                             | Spinal DAVS/surgery/cured                                        | 36/Improved                       |
| 9                               | M/70         | SAH                              | VA Rt/C1                 | Rost, Caud (min) | Brain DAVS/NA/ Tsin Rt                          | Venous aneurysm/spinal DAVS    | NA                                                               | NA                                |
| 10 <sup>d</sup>                 | M/36         | SAH, Rt arm/leg weakness         | ThCerv Rt/C8             | Caud, Rost (min) | No                                              | Venous aneurysm/spinal DAVS    | Spinal DAVS/NBCA, surgery/cured                                  | 6/Improved                        |
| 11                              | M/60         | Progressive neck and arm pain    | VA Rt/C1                 | Rost             | No                                              | Venous aneurysm/spinal DAVS    | Spinal DAVS/NBCA/cured                                           | 1/Improved                        |
| 12                              | M/58         | Sensory changes                  | VA Rt, APA Rt/C1         | Caud             | No                                              | No                             | Spinal DAVS/NBCA/small residual                                  | 8/Worsened                        |

<sup>a</sup> The cervical spinal DAVS was not treated due to advanced age.

<sup>b</sup> Embolization was attempted but aborted due to a coincidental spinal artery from the main feeder.

<sup>c</sup> Recanalization of the shunt was noted on follow-up; thus, surgery was performed.

<sup>d</sup> This case was included in an earlier case report.<sup>17</sup>
